# Supplementary material for: A case for a pragmatic oxygen-based approach to quantifying the biological contribution to the marine carbon sink
Source: Copernicus journal article supplement (doi:10.5194/egusphere-2026-304), 2026-01-30

## Supplementary material for

# A case for a pragmatic oxygen-based approach to quantifying the biological contribution to the marine carbon sink.

Wolfgang Koeve and Ivy Frenger

Biogeochemical Modelling, GEOMAR Helmholtz Centre for Ocean Research Kiel,  
Wischhofstraße 1-3, 24148 Kiel, Germany

\* corresponding authors wkoeve@geomar.de and ifrenger@geomar.de

## SI Tables

**Tab. S1.** Preindustrial state estimates of Cremin. Elemental ratios used ( $R_{C:P}$ ,  $R_{C:O_2}$ ) are those used in our model. See text and Online Methods for details.

| Approach                                                | Global integral (Pg C equivalents) |
|---------------------------------------------------------|------------------------------------|
| $AOU \cdot R_{C:O_2}$                                   | 1562                               |
| $DIC^{remin} \quad \$$                                  | 1290                               |
| $TOU \cdot R_{C:O_2} \quad \$$                          | 1272                               |
| $C^{soft} = (PO_4 - PO_4^{pre}) \cdot R_{C:P} \quad \$$ | 1303                               |
| tracer based $\quad \$$ (average)                       | 1288 $\pm$ 16 (std)                |
| $O_2^{dis,bio} \cdot R_{C:O_2}$                         | 256                                |
| $C^{soft, tracer} + O_2^{dis,bio} \cdot R_{C:O_2}$      | 1544                               |
| $DIC^{dis,bio}$                                         | 520                                |
| $C^{soft, tracer} + DIC^{dis,bio}$                      | 1808                               |

$\quad \$$  estimates based on idealized model tracers  $DIC^{remin}$ ,  $TOU$ , and  $PO_4^{pre}$ ; the term ‘tracer based’ refers to the mean of the three tracer based estimates; see Online Methods for technical definitions and references.

## SI Figures (captions)

**Fig. S1:** Comparison of the preindustrial state estimates of  $O_2$ -saturation ( $O_2^{\text{sat}}$ , mmol  $O_2$  /  $m^3$ ) and preformed  $O_2$  ( $O_2^{\text{pre}}$ , mmol  $O_2$  /  $m^3$ ) of the default model variant. (a) Winter time surface  $O_2$ -saturation (%) showing undersaturation in high latitude waters. (b) Wintertime  $O_2$  disequilibrium ( $O_2^{\text{dis}} = O_2^{\text{pre}} - O_2^{\text{sat}}$ , mmol  $O_2$  /  $m^3$ ). (c)  $O_2^{\text{sat}}$  section through the Atlantic (30°W, from North to South), the Southern Ocean (60°S), and the Pacific Ocean (140°W, from South to North), (d) like (c), but for preformed  $O_2$ , ( $O_2^{\text{pre}}$ , mmol  $O_2$  /  $m^3$ )

**Fig. S2:** Decomposition of the  $O_2$  disequilibrium. (a) total  $O_2$  disequilibrium ( $O_2^{\text{dis}}$ , mmol  $O_2$  /  $m^3$ ), (b) biotic component ( $O_2^{\text{dis,bio}}$ , mmol  $O_2$  /  $m^3$ ), and (c) physical component ( $O_2^{\text{dis,phys}}$ , mmol  $O_2$  /  $m^3$ ). See online methods for details on the methodology applied to decompose  $O_2^{\text{dis}}$ .

**Fig. S3:** Forcing, climate response and global marine response of the default model experiment (ZECmip1000). (a)  $CO_2$ -emissions forcing applied (Pg C / year), (b) change in atmospheric  $pCO_2$  (ppm), (c) change in global mean surface air temperature (SAT, °C), (d) change in northern hemispheric (black) and southern hemispheric sea ice cover ( $1e6 \text{ km}^2$ ). (e) change in net primary production (NPP, Pg C / year). (f) change in export production (Pg C / year). Note: I still have to add the preindustrial values

**Fig. S4:** Sections through the Atlantic (30°W, from North to South), the Southern Ocean (60°S), and the Pacific Ocean (140°W, from South to North), showing the regional distribution of transient changes of AOU (a, b), TOU (c, d), sum  $TOU + O_2^{\text{dis,bio}}$  (e,f), and  $O_2^{\text{dis,bio}}$  (g, h), all in mmol  $O_2$  /  $m^3$ . Panels a, c, e, g show differences between yr 100 and the initial state and panels b, d, f, h show differences between year 800 and the initial state. Warm colors indicate increase over time and cold colors decrease over time.

**Fig. S5:** Descriptive power of AOU during the climate change transient (default model variant), shown as  $\Delta AOU / (\Delta TOU + \Delta O_2^{\text{dis,bio}}) * 100$  (%). Solid line indicates the period with  $\Delta AOU$  lower than -1 Pmol  $O_2$ , dashed line indicates period with  $\Delta AOU$  between 0 and -1 Pmol  $O_2$ .

**Fig. S6:** Transient changes of surface air temperature (a, SAT, °C) and Atlantic meridional overturning (b, AMOC, Sv) from experiments taken from Koeve et al., 2024 and explored in Fig. 3c. In short, experiments have been forced with prescribed atmospheric  $pCO_2$ , initially increasing with 1% per year until reaching  $CO_2$  doubling (all experiments). After reaching peak  $pCO_2$  in year 70, experiments have been forced with decreasing atmospheric  $pCO_2$  until reaching preindustrial  $pCO_2$  again. Prescribed  $pCO_2$  decreased with rates ranging from -1% per year (solid black lines) to -0.1% per year (light blue lines). See Koeve et al., 2024, SI for details.

**Fig. S7:** Three tracer based estimates of globally integrated  $\Delta C^{\text{remin}}$  (BCP storage changes) from the default model variant using ZEC1000 forcing in fully coupled (COU\*, solid lines) and biogeochemically-only coupled experiments (BGC\*, dashed lines). TOU-tracer based estimate (black),  $DIC^{\text{remin}}$  tracer (red), and  $PO_4^{\text{pre}}$  (blue) based estimate. For details and equations see Online Methods.

**Fig. S8:** Forcing, climate response and global marine response of the biogeochemically only coupled model experiment (BGC\*). (a) CO<sub>2</sub>-emissions forcing applied (Pg C / year), (b) change in atmospheric pCO<sub>2</sub> (ppm), (c ) change in global mean surface air temperature (SAT, °C), (d) change in northern hemispheric (black) and southern hemispheric sea ice cover (1e6 km<sup>2</sup>). (e) change in net primary production (NPP, Pg C / year). (f) change in export production (Pg C / year).

**Fig. S9:** Comparison of computed O<sub>2</sub><sup>sat</sup> (T,S) against explicit O<sub>2</sub><sup>sat</sup> tracer. Section through the Atlantic (30°W, from North to South), the Southern Ocean (60°S), and the Pacific Ocean (140°W, from South to North) of (a) O<sub>2</sub><sup>sat</sup>(T,S) - O<sub>2</sub><sup>sat</sup>(tracer) and (b) )O<sub>2</sub><sup>sat</sup>(T,S) - O<sub>2</sub><sup>sat</sup>(tracer)) / O<sub>2</sub><sup>sat</sup>(tracer) \*100

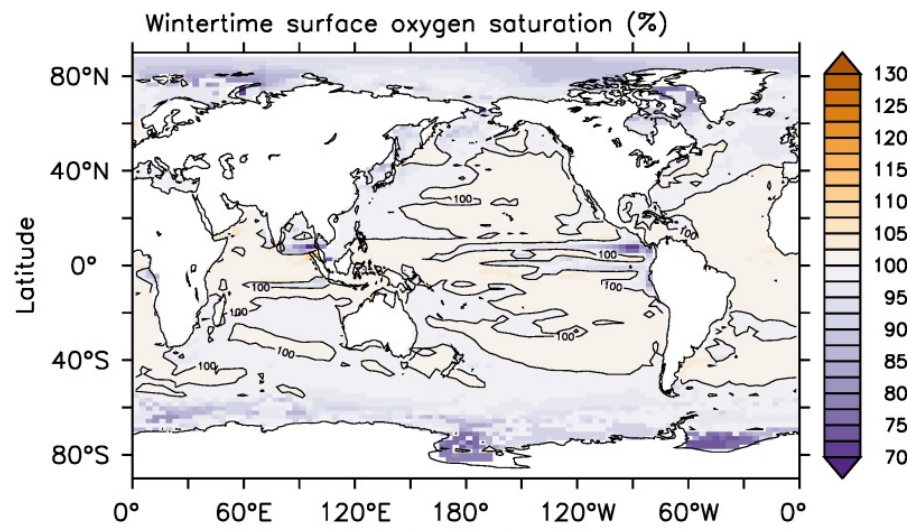

Fig. S1

(a)

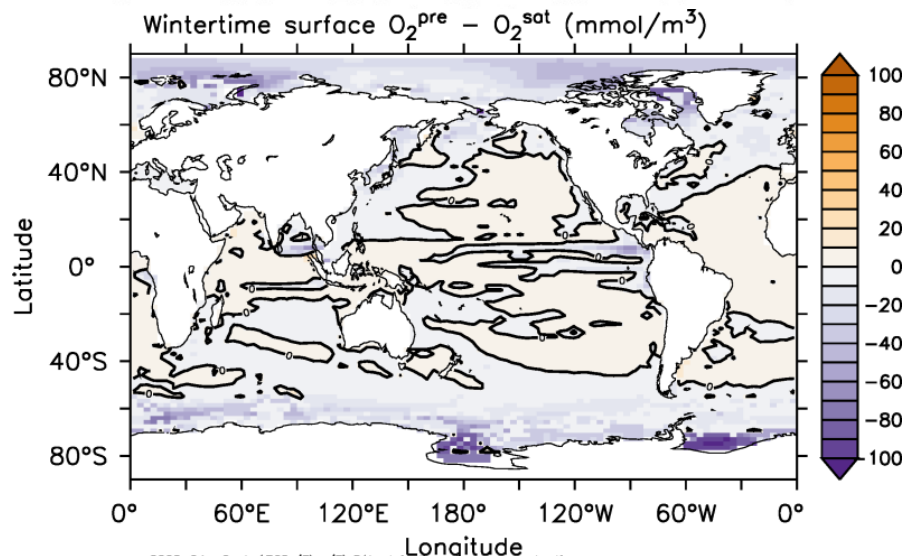

(b)

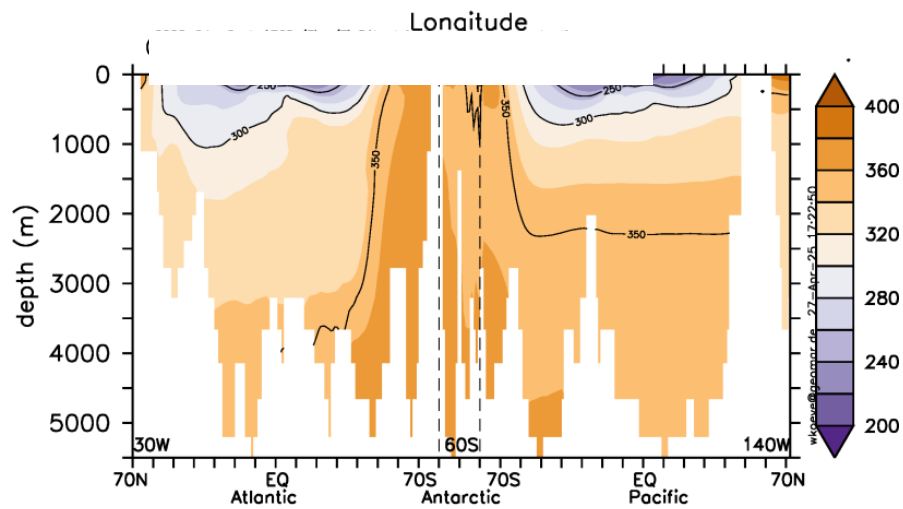

(c)

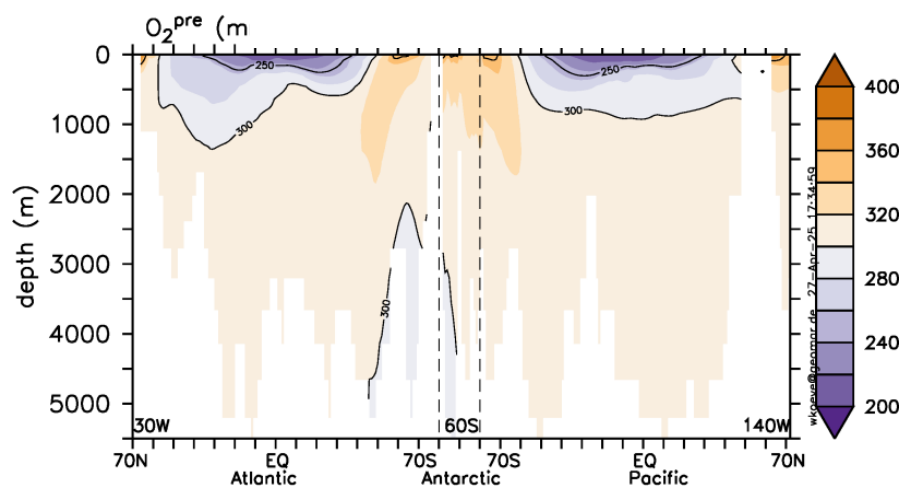

(d)

Fig. S2

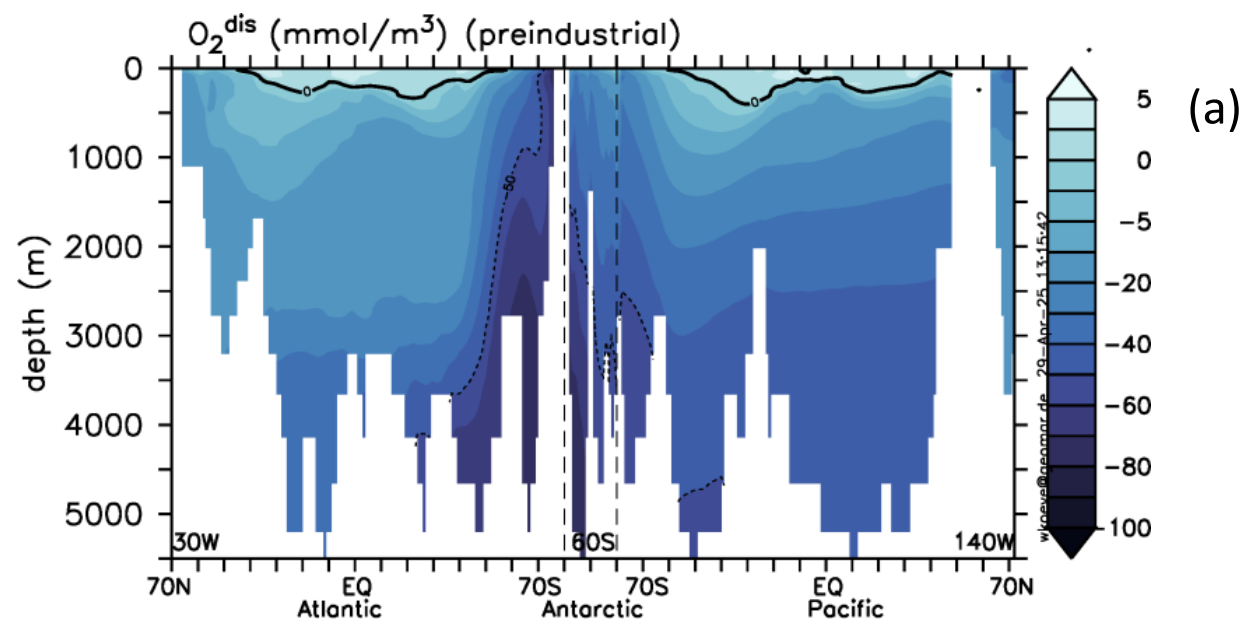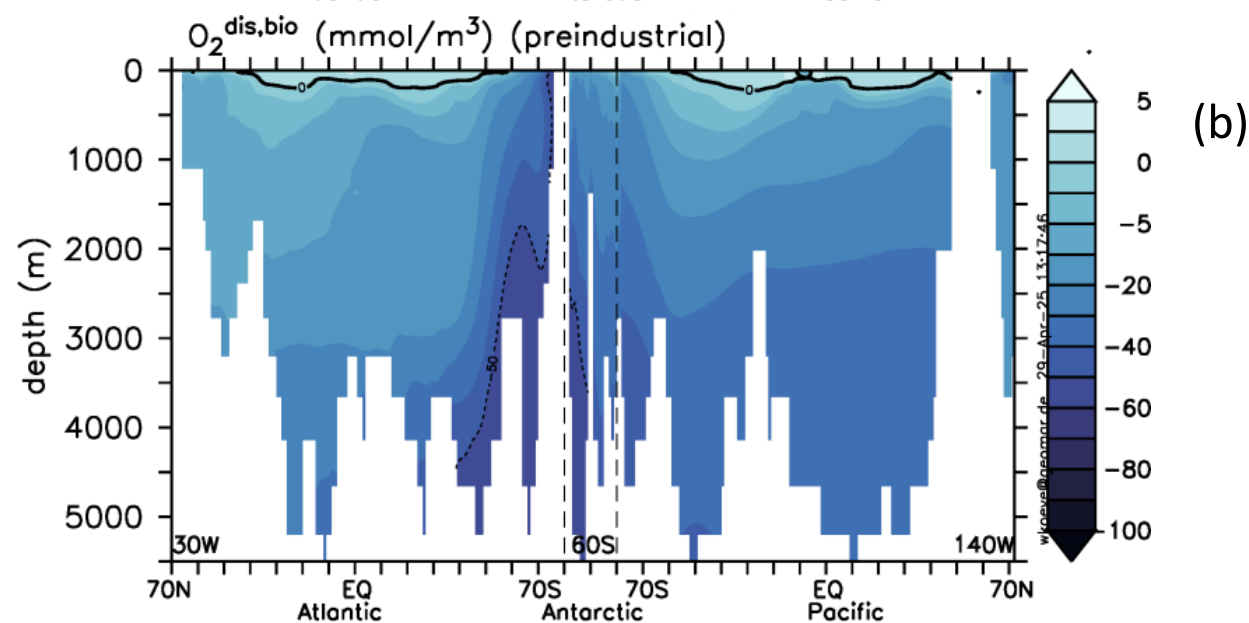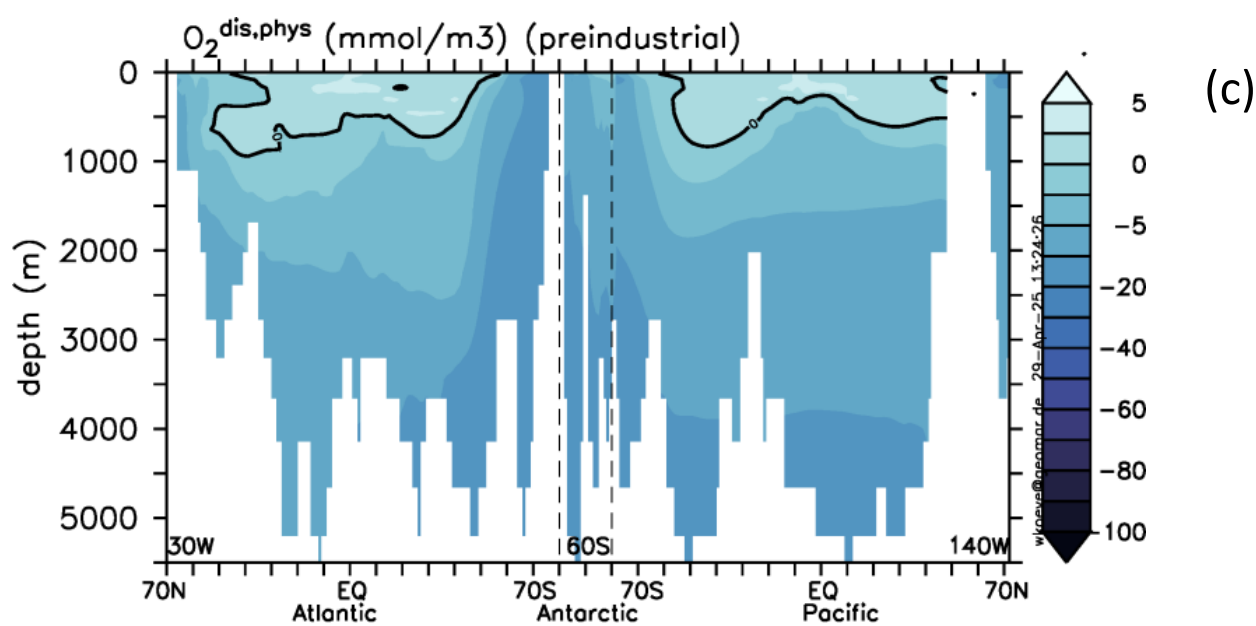

Fig. S3

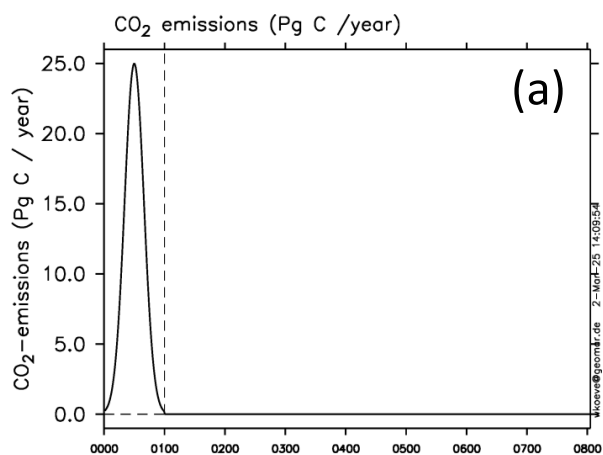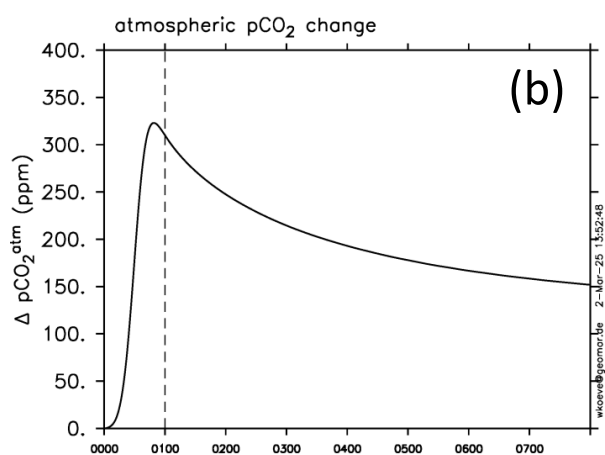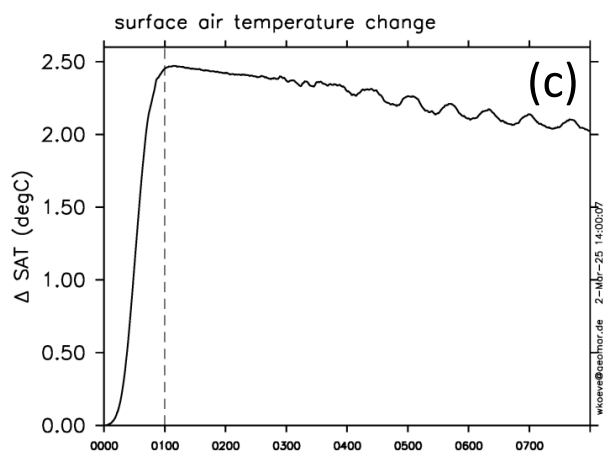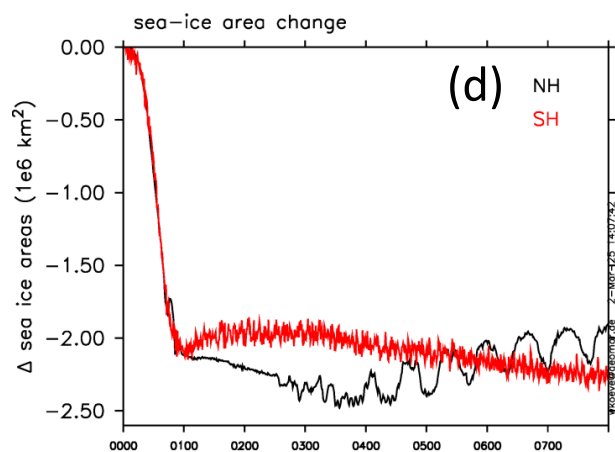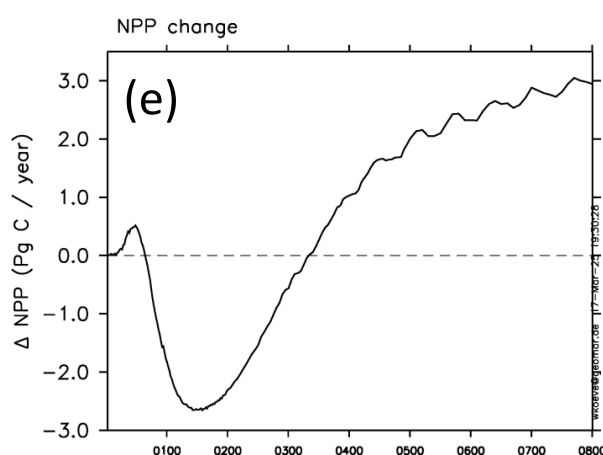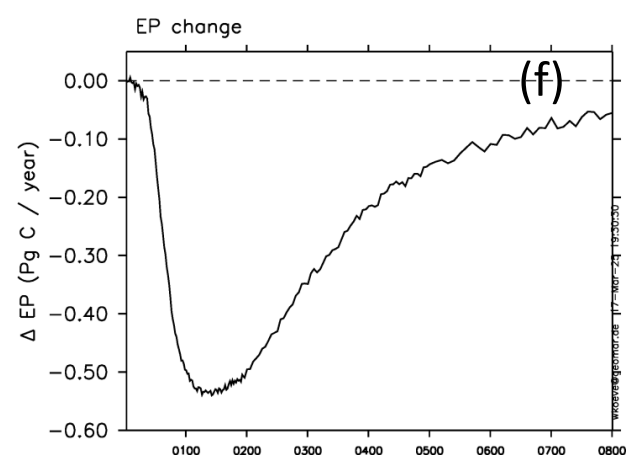

Fig. S4

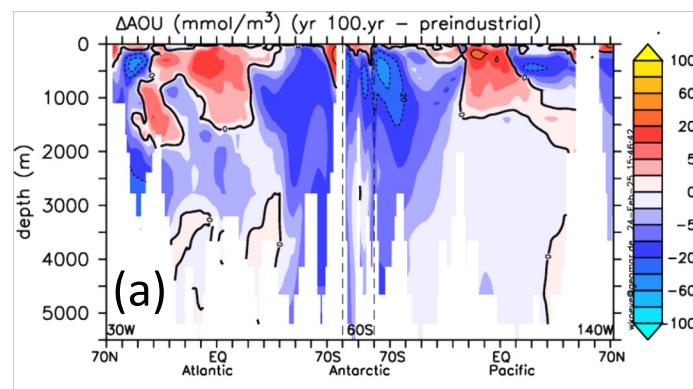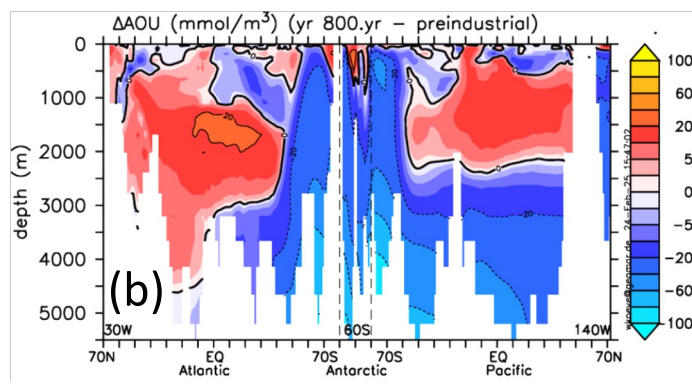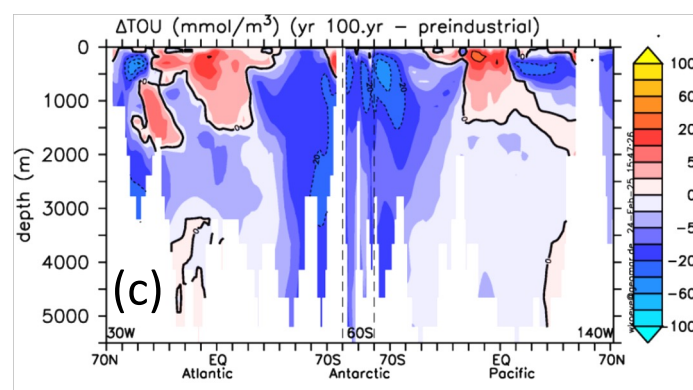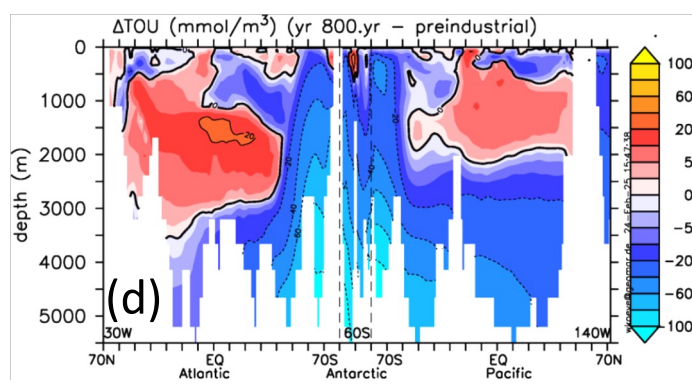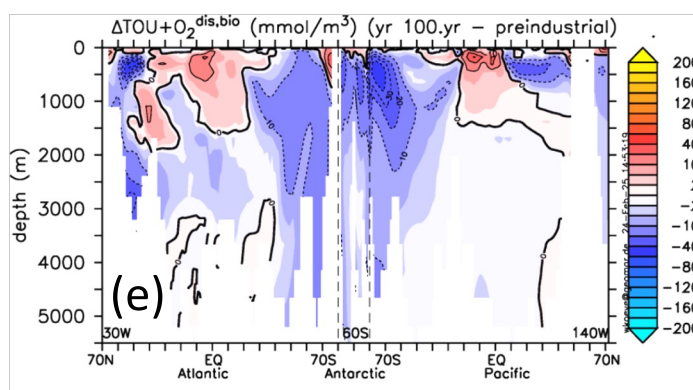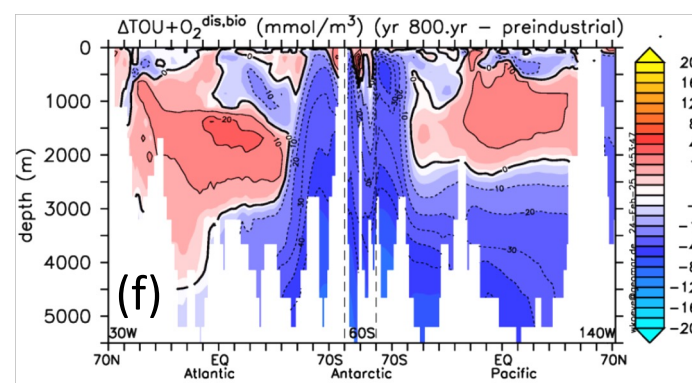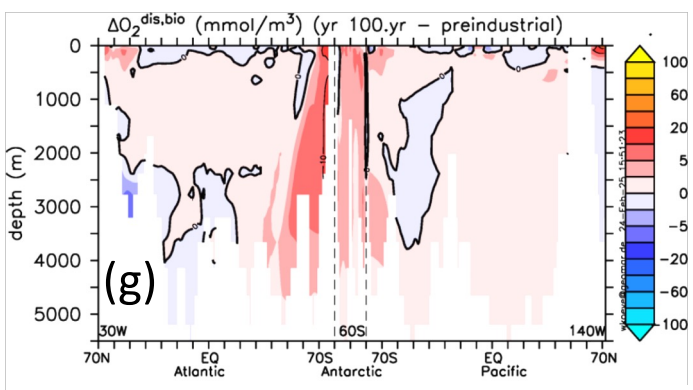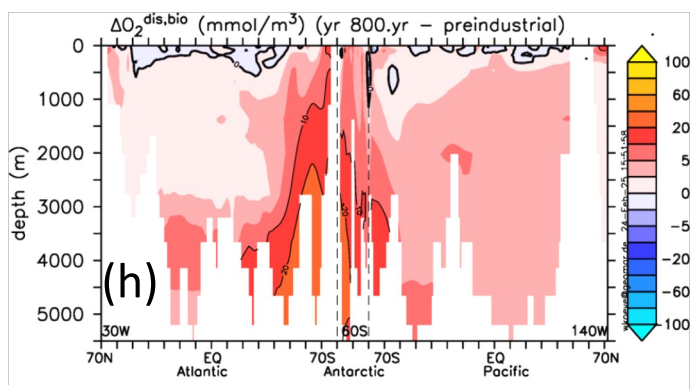

Fig. S5

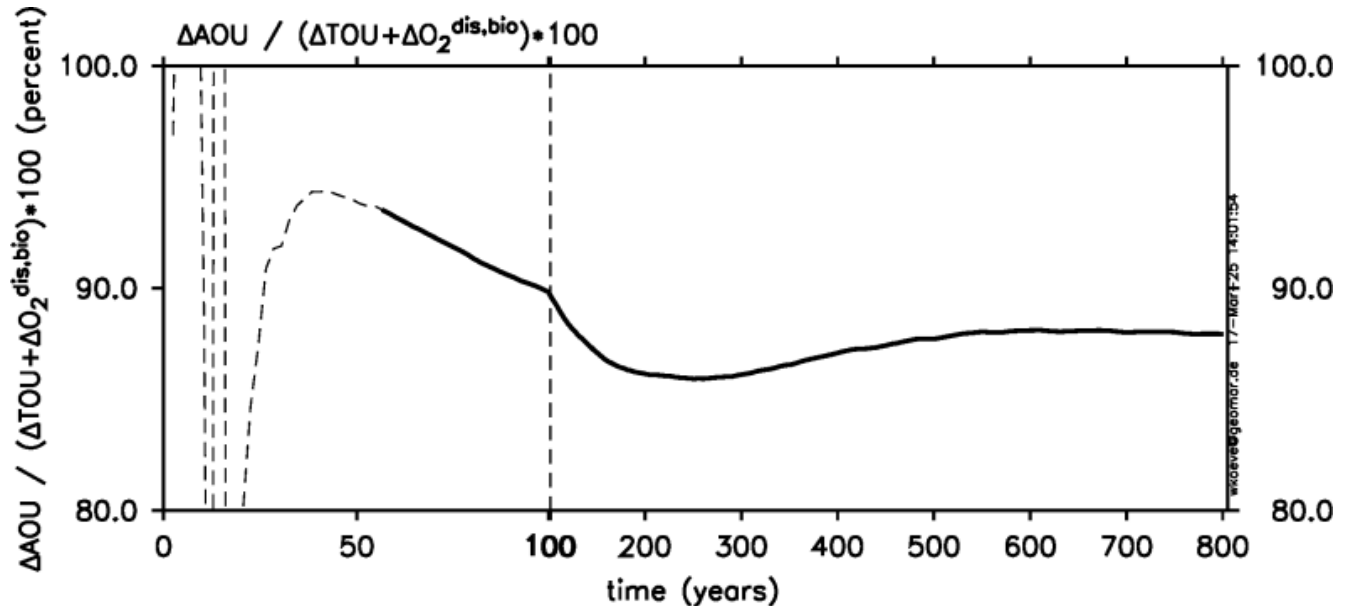



Fig. S6

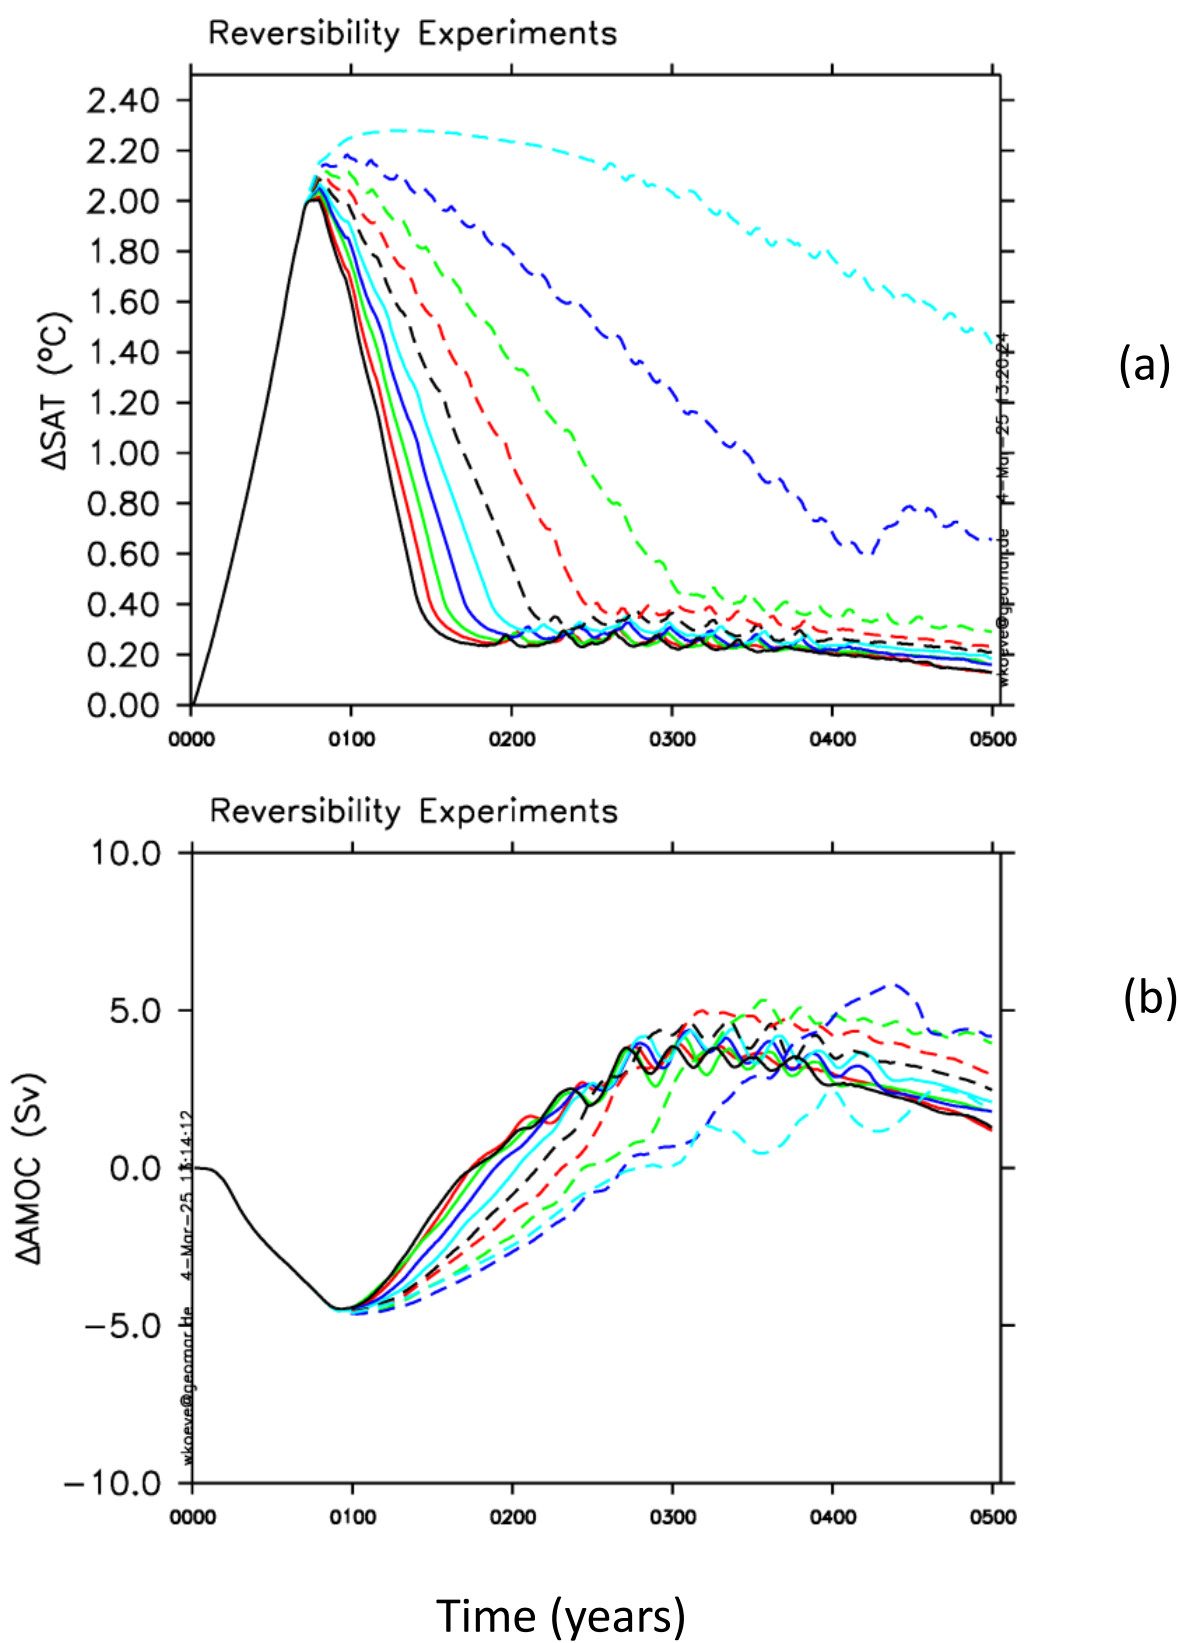

Fig. S7

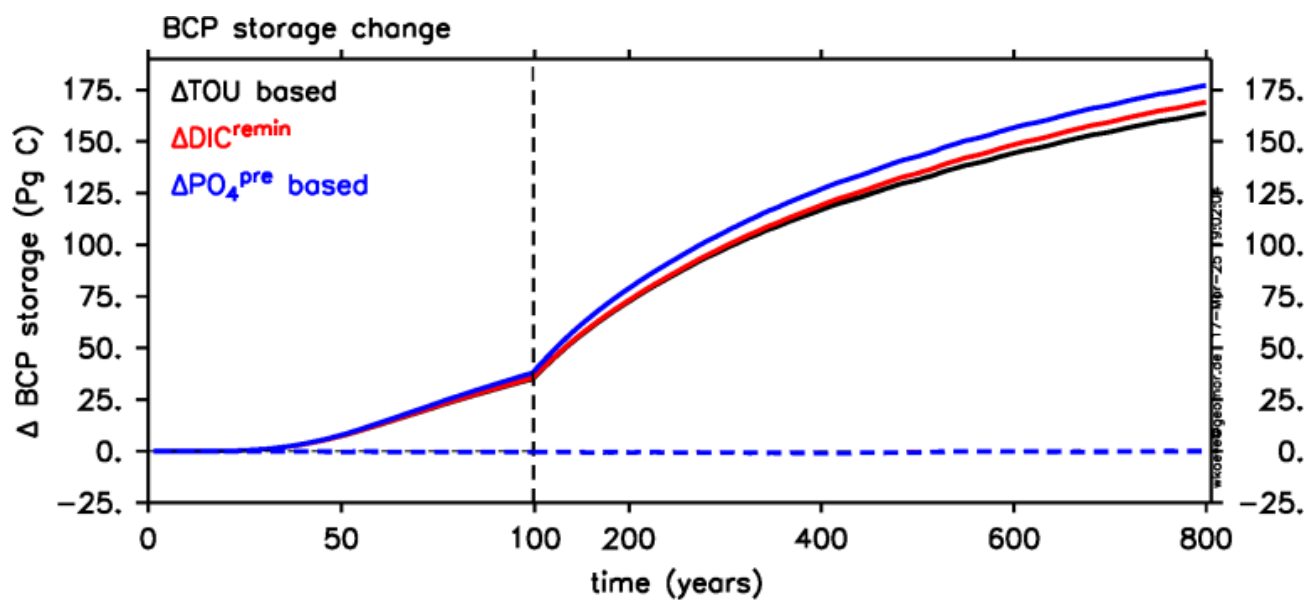

Fig. S8

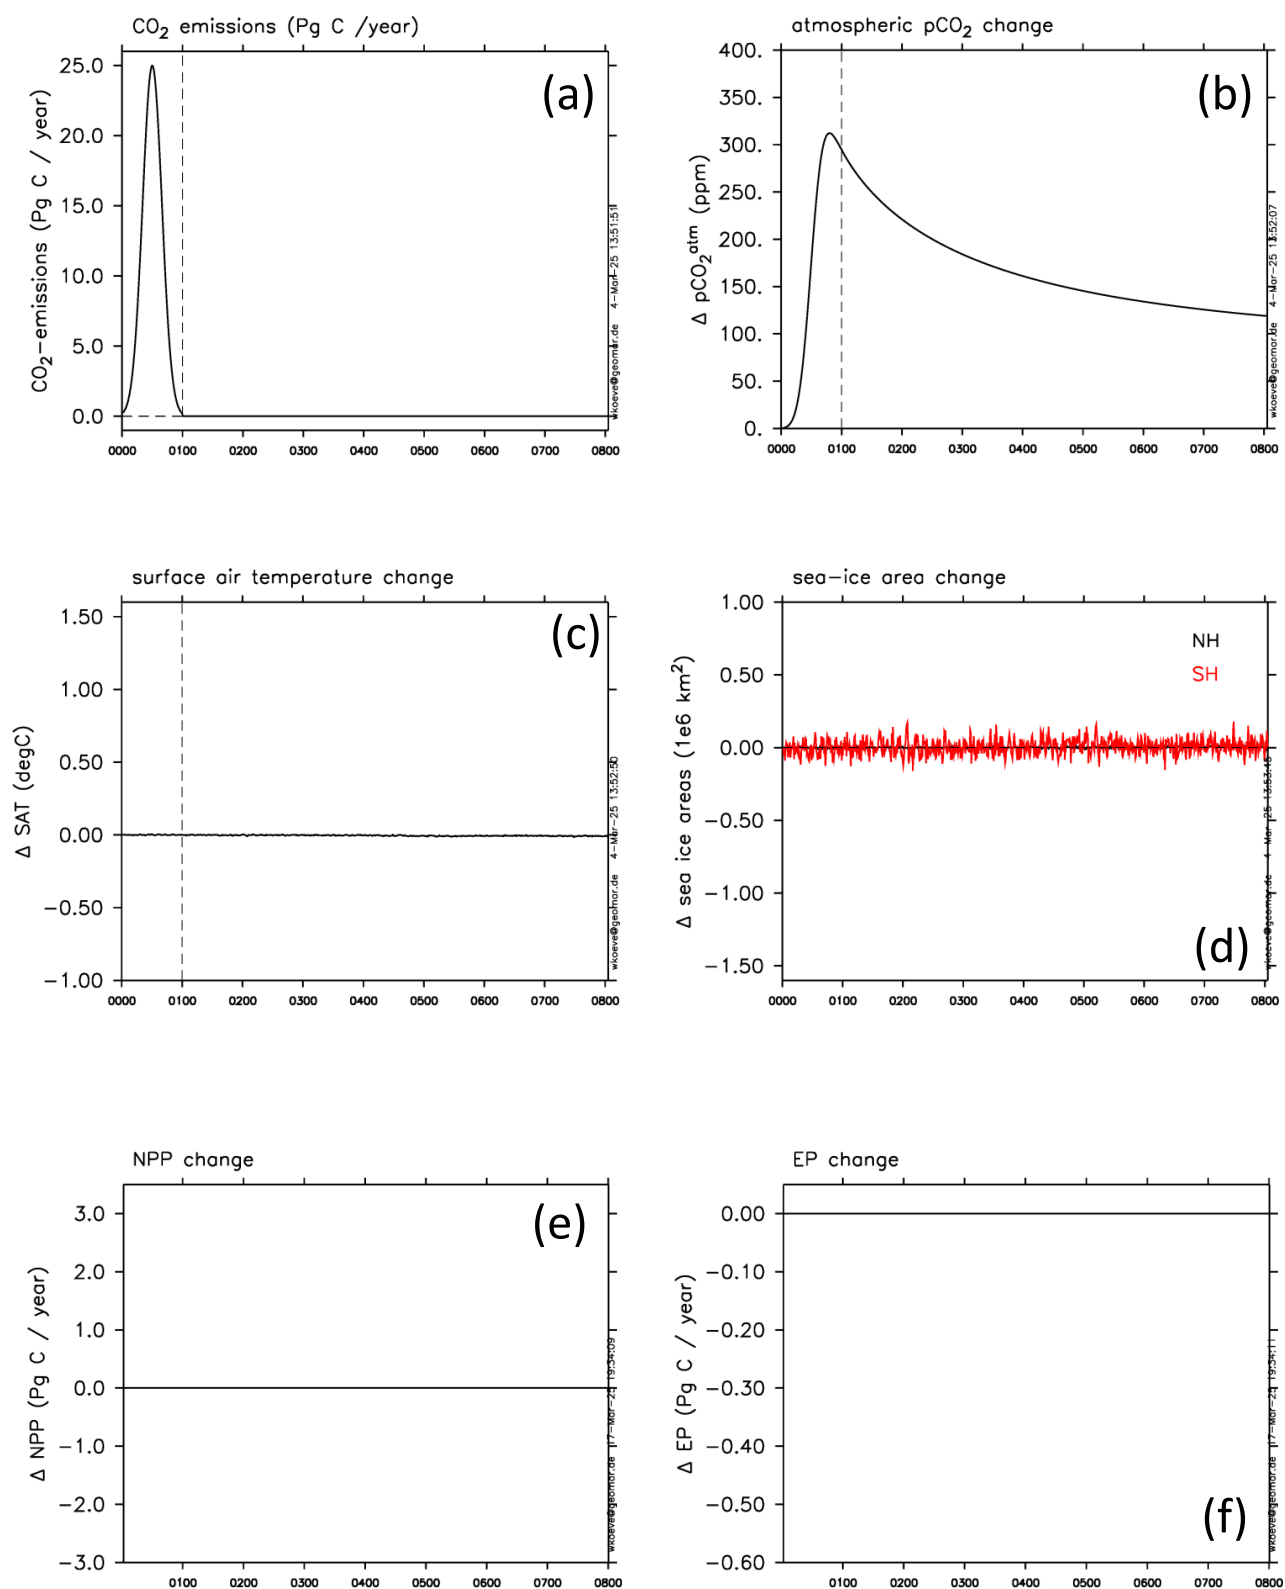

Fig. S9

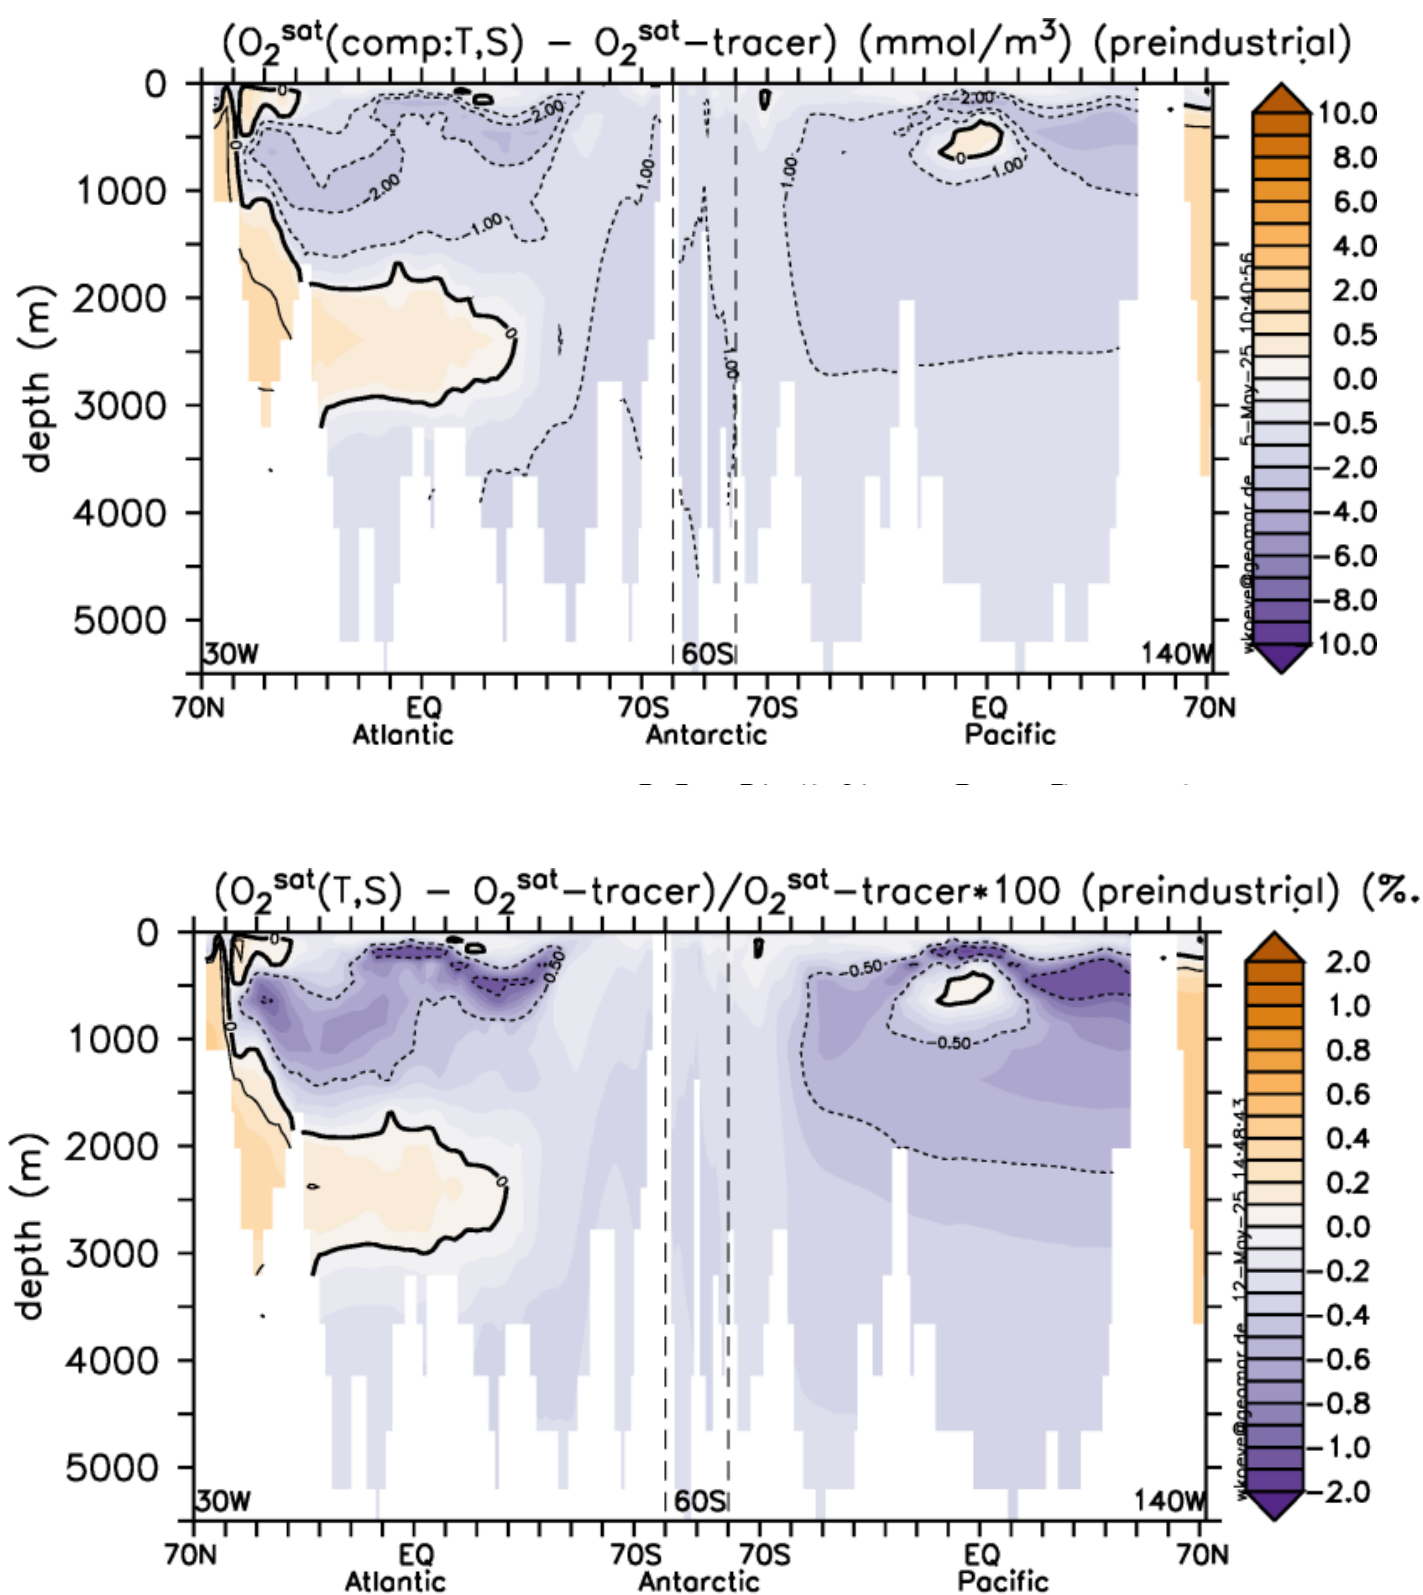

Supplement: Supplementary file 1 [file egusphere-2026-304-supplement.pdf]
